# Supplementary material for: A naphthalimide–quinoline based probe for selective, fluorescence ratiometric sensing of trivalent ions
Source: Royal Society of Chemistry journal article supplement (doi:10.1039/c2ra22624c), 2012-12-18
Supplement: c2ra22624c.pdf [file c2ra22624c.pdf]

## **Supporting Information**

### **A Naphthalimide-Quinoline based probe for selective, fluorescence ratiometric sensing of trivalent ions**

**Shyamaprosad Goswami\* , Krishnendu Aich, Avijit Kumar Das, Abhishek Manna and Sangita Das**

Department of Chemistry, Bengal Engineering and Science University, Shibpur, Howrah 711103, West Bengal, India E-mail: spgoswamical@yahoo.com; Fax: +91-3326682916.

### **CONTENTS**

- 1. General procedure for drawing Job plot by fluorescence method.....**
- 2. Association constants and fluorescence titration curve of Sensor with  $M^{3+}$  ...**
- 3. Determination of detection limit.....**
- 4. Metal ion selectivity profile of the sensor.....**
- 5.  $^1H$  NMR (S5) and Mass spectra (S6) of receptor .....**
- 6. Fluorescence titration spectra of receptor with different guest cations .....**
- 7. UV-vis titration spectra of receptor with  $Fe^{3+}$ ,  $Al^{3+}$  and  $Cr^{3+}$  .....**
- 8. X-ray Crystallographic data.....**

### 1. General procedure for drawing Job plot by fluorescence method:

Stock solution of same concentration of sensor and  $M^{3+}$  (where  $M = Fe^{3+}$ ,  $Al^{3+}$  and  $Cr^{3+}$ ) were prepared in the order of  $20\mu M$  in  $[CH_3CN/H_2O, 40/60, v/v]$  (at  $25\text{ }^\circ C$ ) at pH 7.4 in HEPES buffer. The emission spectrum in each case with different *host-guest* ratio but equal in volume was recorded. Job plots were drawn by plotting  $\Delta I \cdot X_{host}$  vs  $X_{host}$  ( $\Delta I$  = change of intensity of the emission spectrum at 390 nm during titration and  $X_{host}$  is the mole fraction of the host in each case, respectively).

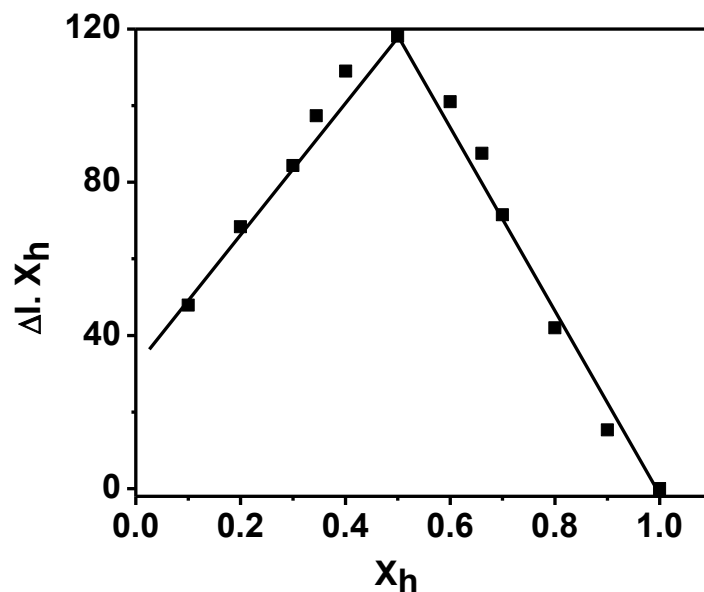

**Figure S1:** Job's plot diagram of receptor for  $Fe^{3+}$  ion (where  $X_h$  is the mole fraction of the host and  $\Delta I$  indicates the change of emission intensity at 390 nm)

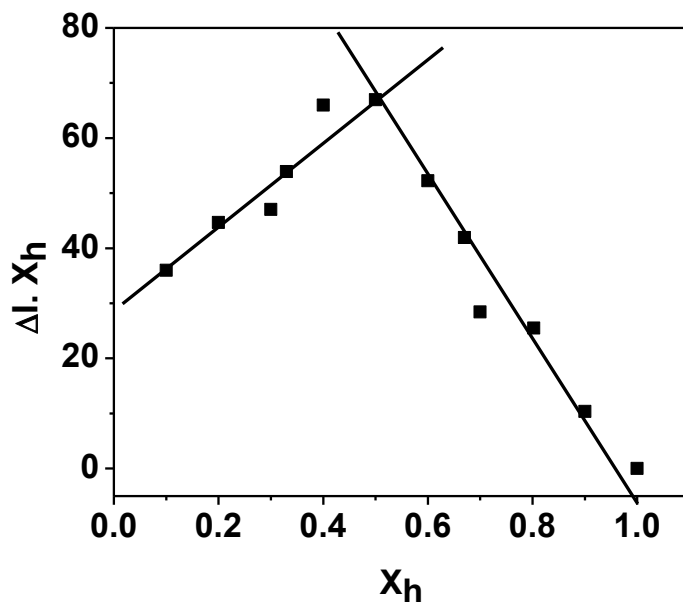

**Figure S2:** Job's plot diagram of receptor for  $Al^{3+}$  ion (where  $X_h$  is the mole fraction of the host and  $\Delta I$  indicates the change of emission intensity at 390 nm)

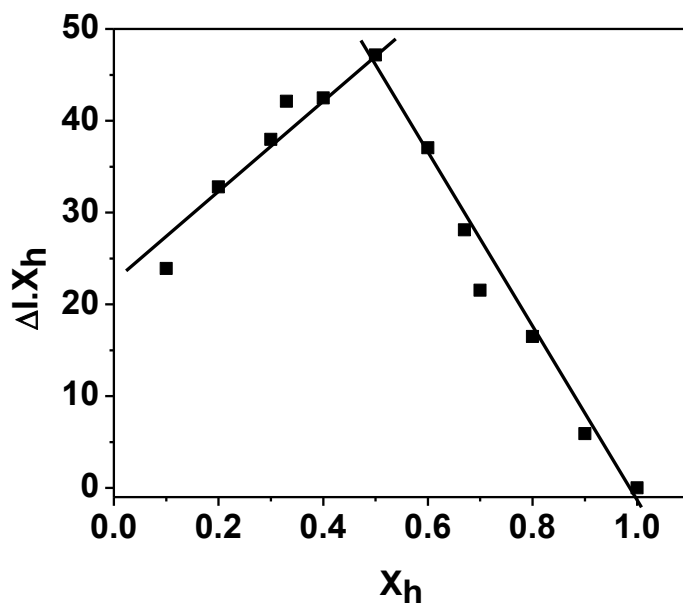

**Figure S3:** Job's plot diagram of receptor for  $\text{Cr}^{3+}$  ion (where  $X_h$  is the mole fraction of the host and  $\Delta I$  indicates the change of emission intensity at 390 nm)

## 2. Association constant determination:

The binding constant value of  $\text{M}^{3+}$  (where  $\text{M} = \text{Fe}^{3+}$ ,  $\text{Al}^{3+}$  and  $\text{Cr}^{3+}$ ) with sensor has been determined from the emission intensity data following the modified Benesi-Hildebrand equation<sup>1</sup>,  $1/\Delta I = 1/\Delta I_{\text{max}} + (1/K[\text{C}]) (1/\Delta I_{\text{max}})$ . Here  $\Delta I = (I - I_{\text{min}})$  and  $\Delta I_{\text{max}} = (I_{\text{max}} - I_{\text{min}})$ , where  $I_{\text{min}}$ ,  $I$ , and  $I_{\text{max}}$  are the emission intensities of sensor considered in the absence of  $\text{M}^{3+}$ , at an intermediate  $\text{M}^{3+}$  concentration, and at a concentration of complete saturation where  $K$  is the binding constant and  $[\text{C}]$  is the  $\text{M}^{3+}$  concentration respectively. From the plot of  $1/(I - I_{\text{min}})$  against  $[\text{C}]^{-1}$  for sensor, the value of  $K$  has been determined from the ratio of intercept and slope of Benesi-Hildebrand plot. As the plot of  $1/(I - I_{\text{min}})$  vs  $1/[\text{C}]$  gives a straight line, indicates the 1:1 complexation of the sensor with  $\text{M}^{3+}$ . The association constant ( $K_a$ ) as determined by fluorescence titration method for sensor with  $\text{Fe}^{3+}$ ,  $\text{Al}^{3+}$  and  $\text{Cr}^{3+}$  are found to be  $1.0852 \times 10^4 \text{ M}^{-1}$ ,  $8.770 \times 10^3 \text{ M}^{-1}$  and  $5.676 \times 10^3 \text{ M}^{-1}$  respectively (error  $\pm 10\%$ ).

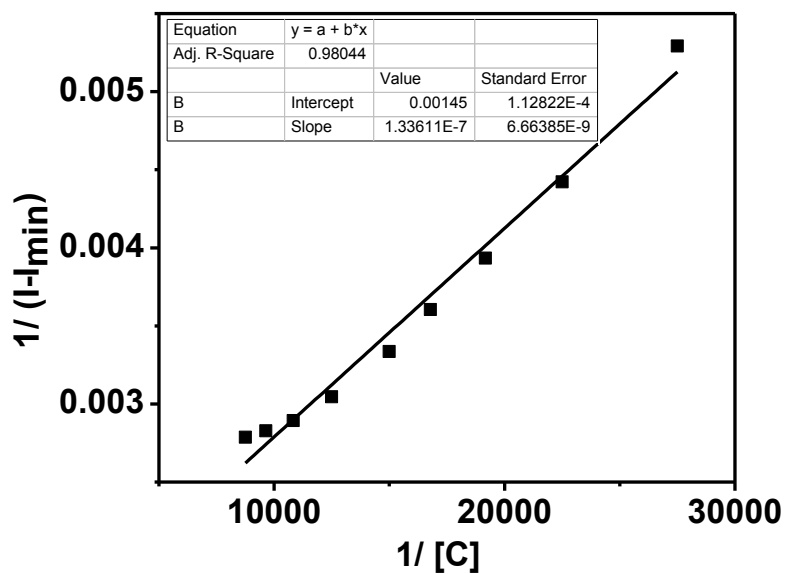

**Figure S4:** Benesi-Hildebrand plot from fluorescence titration data of receptor (20  $\mu\text{M}$ ) with  $\text{Fe}^{3+}$ .

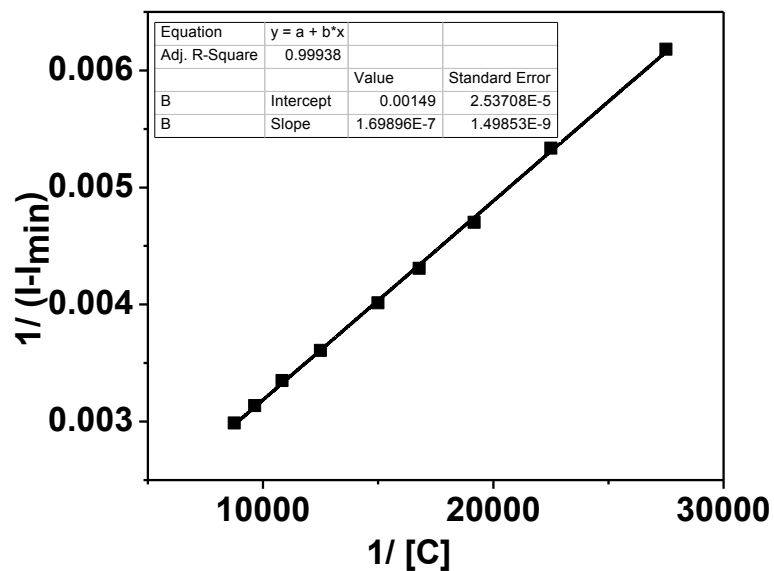

**Figure S5:** Benesi-Hildebrand plot from fluorescence titration data of receptor (20  $\mu\text{M}$ ) with  $\text{Al}^{3+}$ .

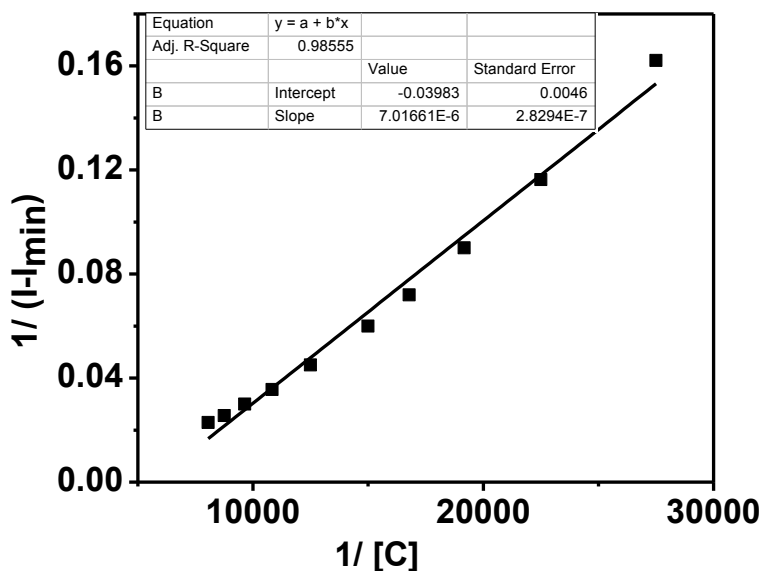

**Figure S6:** Benesi-Hildebrand plot from fluorescence titration data of receptor (20  $\mu\text{M}$ ) with  $\text{Cr}^{3+}$ .

### 3. Determination of detection limit:

The detection limit (DL) of NAQ for  $\text{Fe}^{3+}$ ,  $\text{Al}^{3+}$  and  $\text{Cr}^{3+}$  were determined from the following equation:

$$\text{DL} = K * \text{Sb1}/\text{S}$$

Where  $K = 2$  or  $3$  (we take  $3$  in this case);  $\text{Sb1}$  is the standard deviation of the blank solution;  $\text{S}$  is the slope of the calibration curve.

For  $\text{Fe}^{3+}$ :

From the graph we get slope = 16700.99, and  $\text{Sb1}$  value is 0.115058

Thus using the formula we get the Detection Limit = 20  $\mu\text{M}$  i.e. NAQ can detect  $\text{Fe}^{3+}$  in this minimum concentration.

For  $\text{Al}^{3+}$ :

From the graph we get slope = 7.53E+03, and  $\text{Sb1}$  value is 0.059735

Thus using the formula we get the Detection Limit = 23  $\mu\text{M}$  i.e. NAQ can detect  $\text{Al}^{3+}$  in this minimum concentration.

For  $\text{Cr}^{3+}$ :

From the graph we get slope = 2662.453, and  $\text{Sb1}$  value is 0.022587

Thus using the formula we get the Detection Limit = 25  $\mu\text{M}$  i.e. NAQ can detect  $\text{Cr}^{3+}$  in this minimum concentration.

#### 4. Metal ion selectivity profile of the sensor :

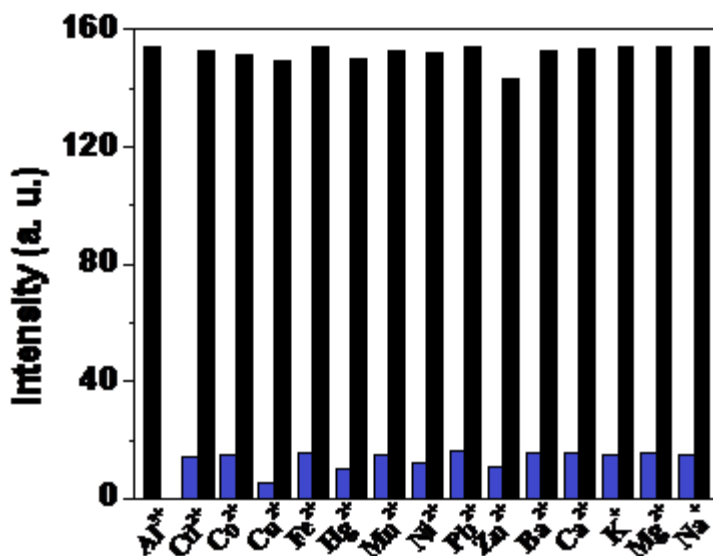

**Figure S7:** Metal ion selectivity profile of the receptor (20  $\mu\text{M}$ ): (black bars) change of emission intensity of receptor + 10 equiv  $\text{M}^{n+}$ ; (blue bars) change of emission intensity of receptor + 10 equiv  $\text{M}^{n+}$ , followed by 3 equiv  $\text{Al}^{3+}$  at 484 nm

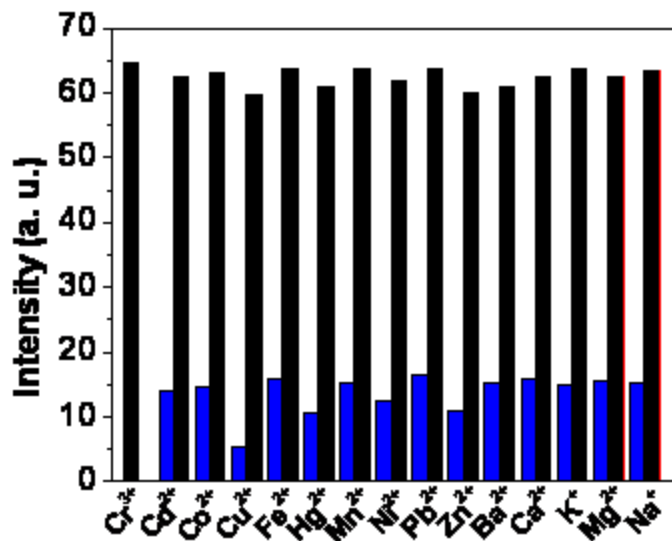

**Figure S8:** Metal ion selectivity profile of the receptor (20  $\mu\text{M}$ ): (black bars) change of emission intensity of receptor + 10 equiv  $\text{M}^{n+}$ ; (blue bars) change of emission intensity of receptor + 10 equiv  $\text{M}^{n+}$ , followed by 3 equiv  $\text{Cr}^{3+}$  at 484 nm

5.

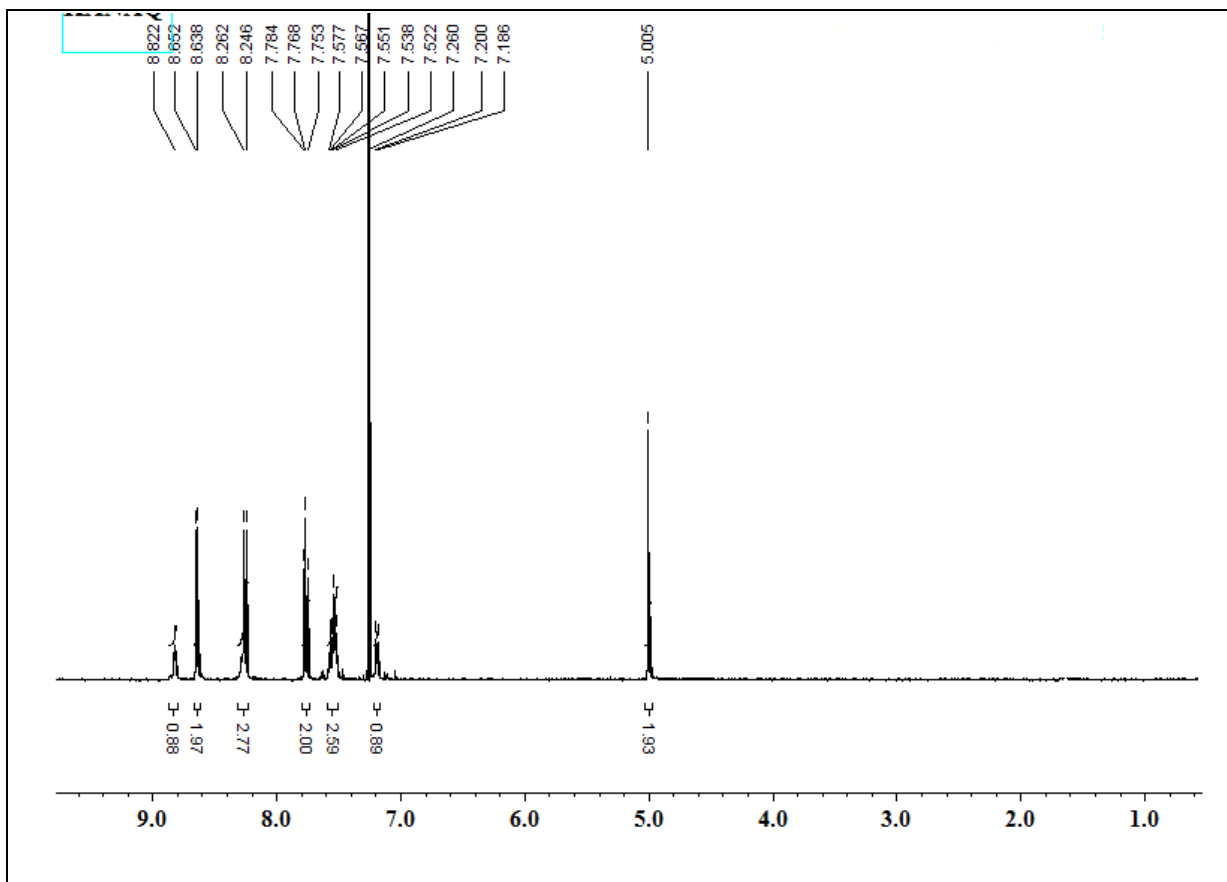

**S9: <sup>1</sup>H NMR spectrum of NAQ**

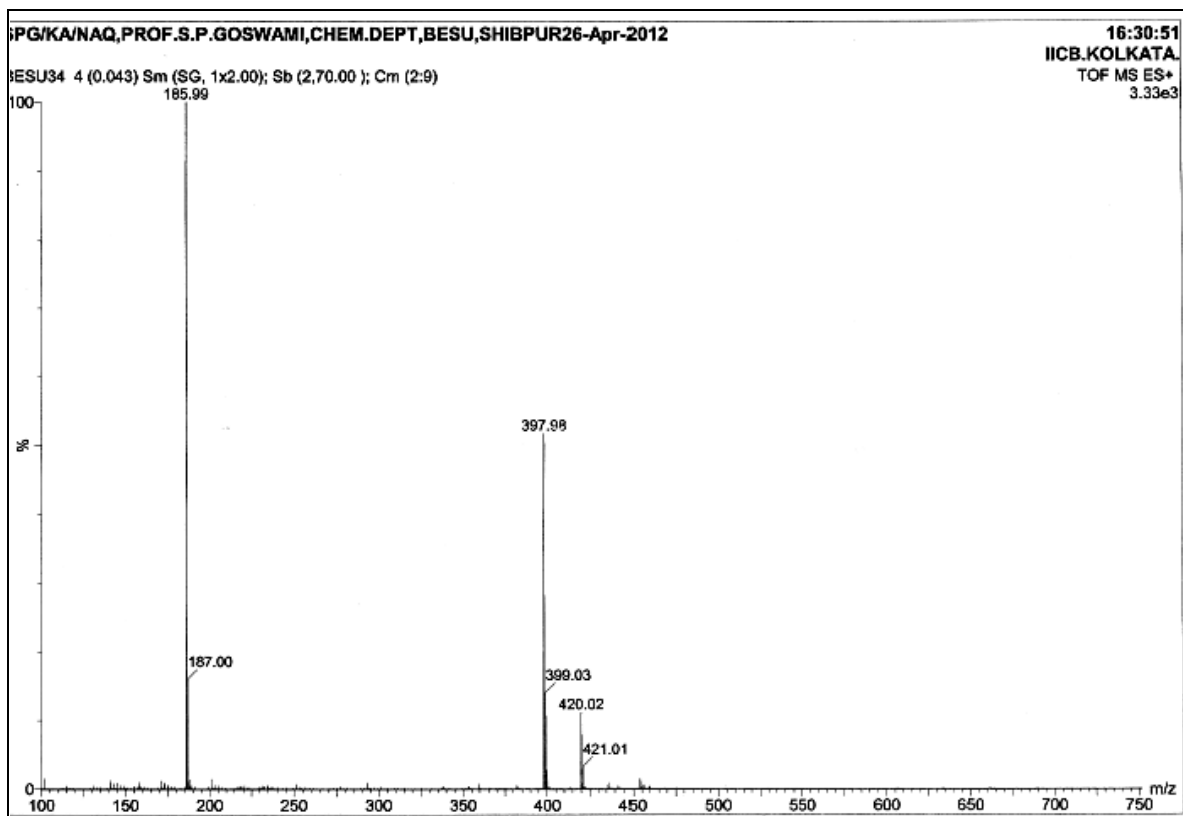

**S10: Mass spectrum of NAQ.**

**6. Fluorescence titration spectra of receptor with different guest cations:**

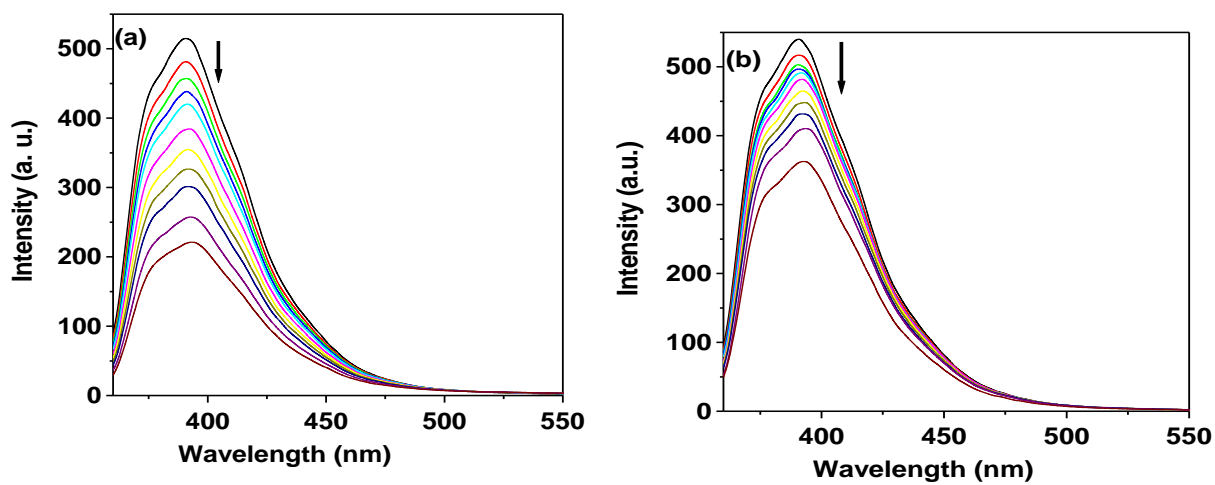



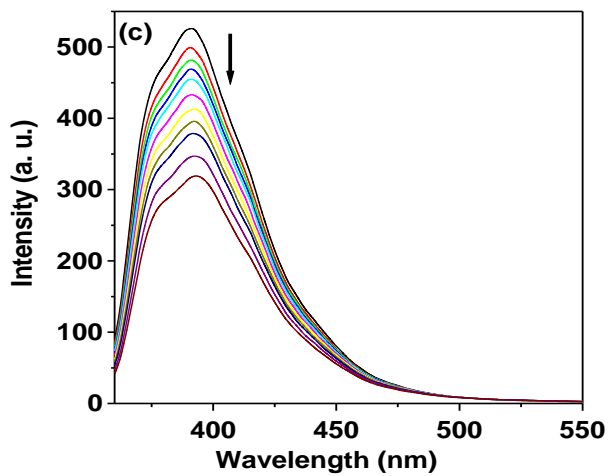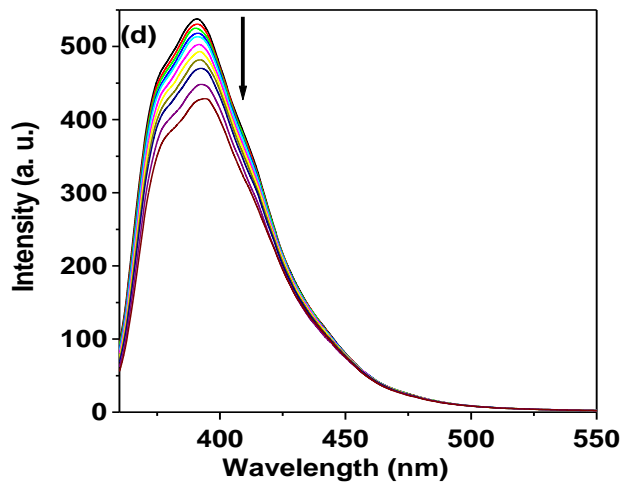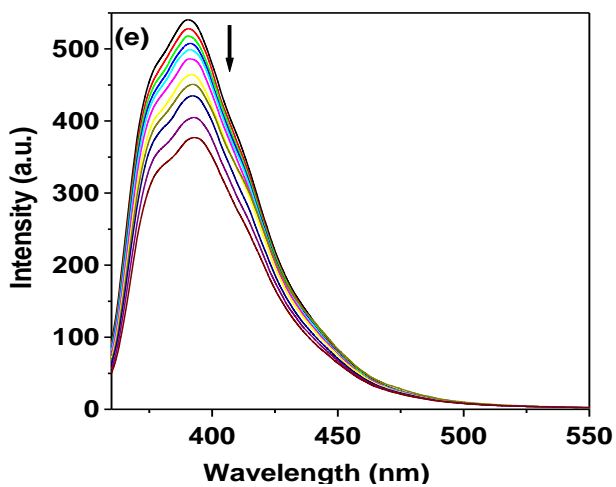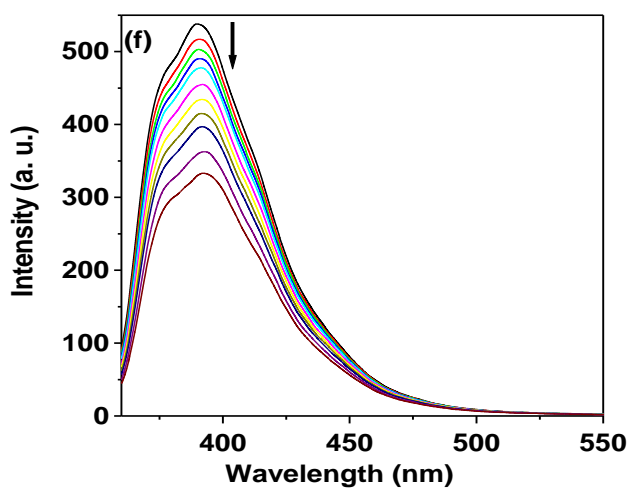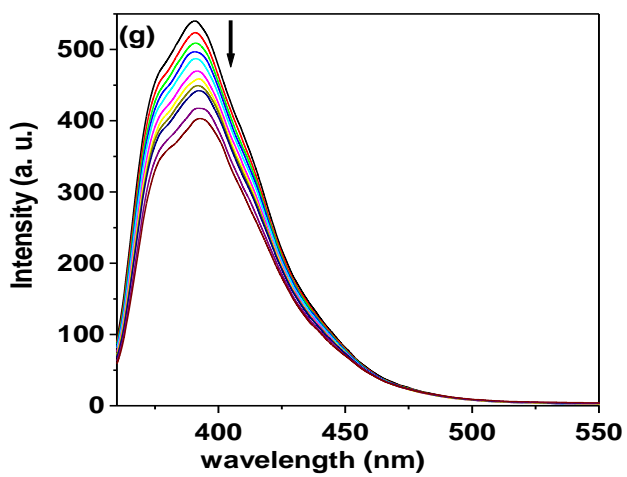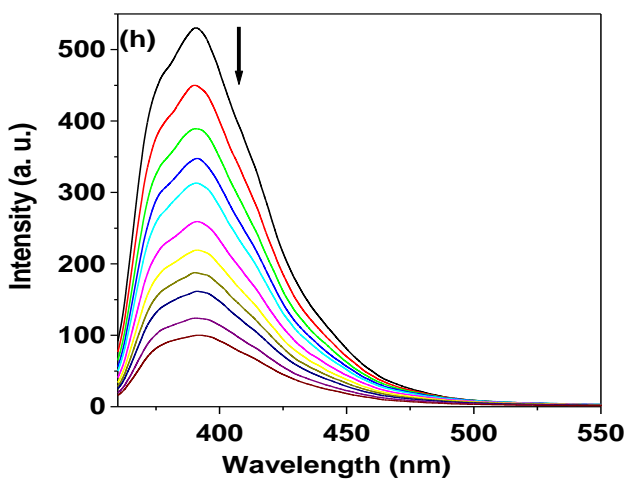

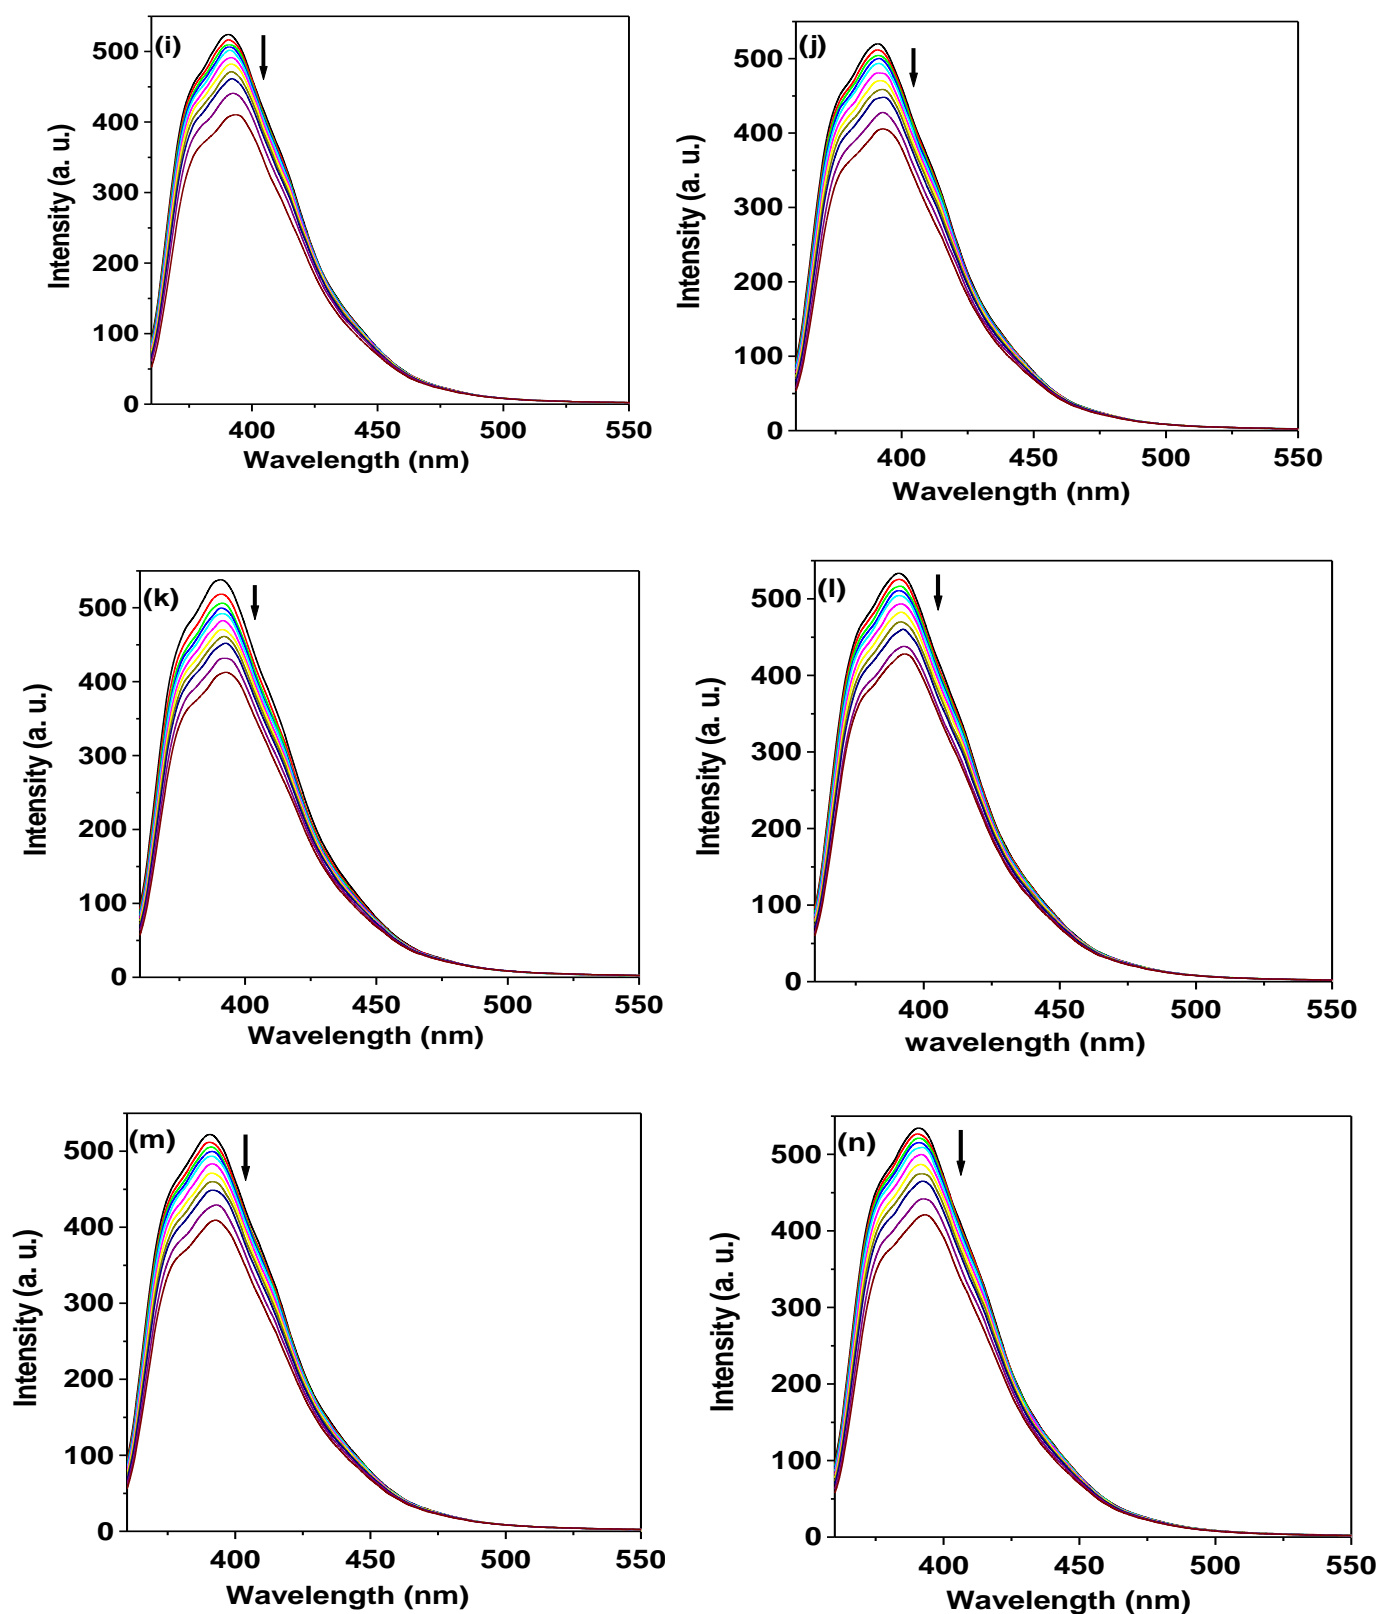

**Figure S11:** Fluorescence titration spectra of receptor (20 μM in CH<sub>3</sub>CN/ H<sub>2</sub>O, 40/60, v/v, HEPES buffer solution) with (0- 10 equiv.) of (a) Zn<sup>2+</sup>, (b) Hg<sup>2+</sup>, (c) Cd<sup>2+</sup>, (d) Fe<sup>2+</sup>,

(e)  $\text{Co}^{2+}$ , (f)  $\text{Ni}^{2+}$ , (g)  $\text{Pb}^{2+}$ , (h)  $\text{Cu}^{2+}$ , (i)  $\text{Mn}^{2+}$ , (j)  $\text{Ba}^{2+}$ , (k)  $\text{Ca}^{2+}$ , (l)  $\text{K}^+$ , (m)  $\text{Mg}^{2+}$ , (n)  $\text{Na}^+$  respectively.

### 7. UV-vis titration spectra of the sensor with $\text{Fe}^{3+}$ , $\text{Al}^{3+}$ and $\text{Cr}^{3+}$ :

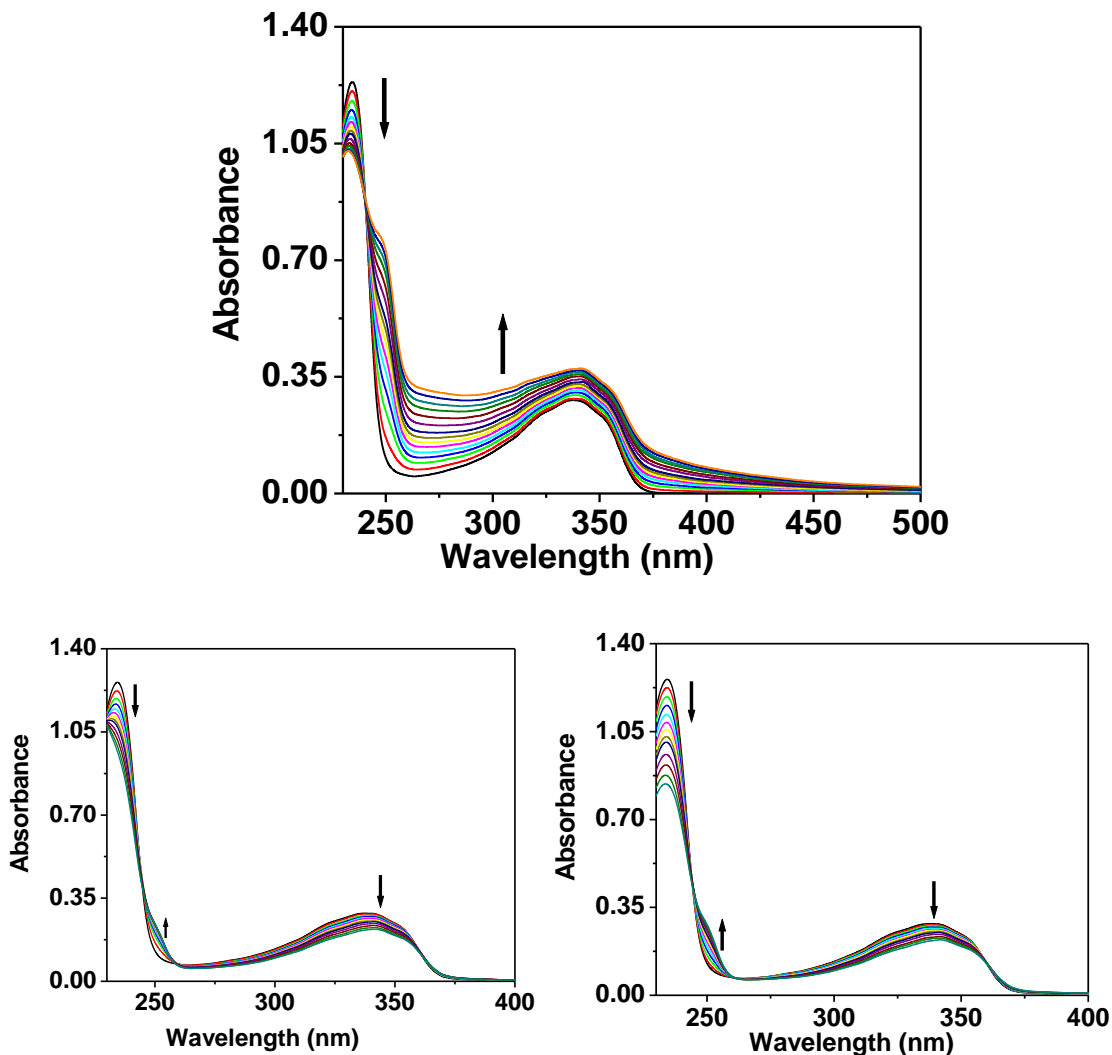

**Figure S12:** UV-vis titration spectra of NAQ with (a)  $\text{Fe}^{3+}$ , (b)  $\text{Al}^{3+}$  and (c)  $\text{Cr}^{3+}$  (0 to 10 equivalents) in  $\text{CH}_3\text{CN} / \text{H}_2\text{O}$  (40/ 60, v/v, pH=7.4) solutions.

### 9. Crystallographic data and details of the structure determination of receptor (NAQ):

The data were collected using a Bruker-APEX II SMART CCD diffractometer with the graphite monochromated Mo- $\text{K}\alpha$  radiation ( $\lambda = 0.71073$ ) at a detector distance of 5 cm and with APEX2 software. For data processing and absorption correction the packages SAINT<sup>1</sup> and SADABS<sup>2</sup> were used. The structures were solved by direct and Fourier methods and refined by full-matrix least squares based on F2 using SHELXTL<sup>3</sup> and SHELXL-97<sup>4</sup> packages. The crystallographic data and hydrogen bond geometry are

presented in Tables 1 and 2, respectively. Crystallographic data for receptor **NAQ** has been deposited with the Cambridge Crystallographic Data Center No. CCDC 888916.

**Table 1:**

---

|                                               |                                                               |
|-----------------------------------------------|---------------------------------------------------------------|
| CCDC No.                                      | 888916                                                        |
| Empirical Formula                             | C <sub>23</sub> H <sub>15</sub> N <sub>3</sub> O <sub>4</sub> |
| Formula weight                                | 397.38                                                        |
| Crystal system                                |                                                               |
| Space group                                   | P b c a                                                       |
| T [K]                                         | 296 K                                                         |
| <i>a</i> [Å]                                  | 15.1430(4)                                                    |
| <i>b</i> [Å]                                  | 13.8141(4)                                                    |
| <i>c</i> [Å]                                  | 17.0179(5)                                                    |
| $\alpha$ [deg]                                | 90                                                            |
| $\beta$ [deg]                                 | 90                                                            |
| $\gamma$ [deg]                                | 90                                                            |
| Z                                             | 8                                                             |
| <i>V</i> [Å <sup>3</sup> ]                    | 3559.92(17)                                                   |
| <i>D</i> <sub>calc</sub> [g/cm <sup>3</sup> ] | 1.483                                                         |
| <i>F</i> [000]                                | 1648.0                                                        |
| Crystal size [mm]                             | 0.10 x 0.20 x 0.30                                            |
| Theta min-max [deg]                           | 2.3, 27.1                                                     |
| $\mu$ [mm <sup>-1</sup> ]                     | 0.104                                                         |
| Reflections collected                         | 34767                                                         |
| Unique reflections                            | 3918                                                          |
| Observed reflections                          | 2982                                                          |
| <i>R</i> [ $F^2 > 2\sigma(F^2)$ ]             | 0.0394                                                        |
| w <i>R</i> ( $F^2$ )                          | 0.1561                                                        |

---

**References:**

- (1) APEX-II, SAINT-Plus, and TWINABS; Bruker-Nonius AXS, Inc.: Madison, WI, 2004
- (2) Sheldrick, G. M. SAINT, version 6.02 and SADABS, version 2.03; Bruker AXS, Inc.: Madison, WI, 2002.
- (3) SHELXTL, version 6.10; Bruker AXS, Inc.: Madison, WI, 2002.
- (4) Sheldrick, G. M. SHELXL-97, Crystal Structure Refinement Program; University of Göttingen: Germany, 1997.
